CORRECTION

# Correction: Nash equilibrium of attack and defense behaviors between predators and prey

The *PLOS Computational Biology* Staff

## Notice of Republication

Incorrect versions of S2 Data, S3 Data, S4 Data, S5 Data, S6 Data, S8 Data and S9 Data were published in error. This article was republished on January 28, 2026, to replace these with the correct files.

The publisher apologizes for the error. Please download this article again to view the correct version. The originally published, uncorrected article and the republished, corrected articles are provided here for reference.

## Supporting information

**S1 File. Originally published, uncorrected article.**  
(PDF)

**S2 File. Republished, corrected article.**  
(PDF)

## Reference

1. Ichijo H, Kawamura Y, Nakamura T. Nash equilibrium of attack and defense behaviors between predators and prey. *PLoS Comput Biol*. 2025;21(11):e1013730. <https://doi.org/10.1371/journal.pcbi.1013730> PMID: [41270101](https://pubmed.ncbi.nlm.nih.gov/41270101/)

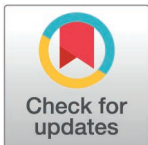

## OPEN ACCESS

**Citation:** The *PLOS Computational Biology* Staff (2026) Correction: Nash equilibrium of attack and defense behaviors between predators and prey. *PLoS Comput Biol* 22(2): e1013969. <https://doi.org/10.1371/journal.pcbi.1013969>

**Published:** February 13, 2026

**Copyright:** © 2026 The *PLOS Computational Biology* Staff. This is an open access article distributed under the terms of the [Creative Commons Attribution License](https://creativecommons.org/licenses/by/4.0/), which permits unrestricted use, distribution, and reproduction in any medium, provided the original author and source are credited.
